# Supplementary material for: Extracellular matrix mediates moruloid-blastuloid morphodynamics in malignant ovarian spheroids
Source: Life Sci Alliance. 2021 Aug 10;4(10):e202000942. doi: 10.26508/lsa.202000942 (PMC8358442; doi:10.26508/lsa.202000942)
Supplement: Supplementary file 8 [file LSA-2020-00942_Supplemental_Data_1.xlsx]

## Sheet: Sheet1
NAME	day1-1	day-2	day1-3	1week-1	1week-2	1week-3
GPNMB	-0.0832444	-0.266018	-0.36002	1.31839	1.7713	1.63794
KRT5	-0.559795	-0.392937	-0.712441	1.03864	1.62142	1.49194
FBLN1	-0.24302	0.155755	-0.114014	1.51674	1.55808	1.52436
NIT2	0.211353	-0.0610667	-0.391426	1.55067	1.57594	1.351
SERPINE2	-1.5369	-1.18378	-1.17163	0.737035	0.899556	0.674995
P02511	-0.888166	-1.0702	-1.16986	0.833459	0.878122	1.48229
CRYAB	-0.253858	-0.086087	-0.423699	1.21774	1.28798	1.23143
AKR1C3	0.109422	0.361086	0.01473	1.17123	1.17605	1.17128
COX6C	-0.567551	-0.195946	-0.644586	1.19584	1.42075	1.28683
ETFA	-0.434506	-0.173764	-0.9285	1.45279	1.74601	1.35984
PRKAR2A	0.336157	0.156346	0.296696	1.28014	1.21478	1.11267
ATP5F1D	-0.825573	-1.1569	-1.13062	0.708815	1.12088	1.00937
SRSF4	-0.661722	-1.00265	-1.24543	0.799156	0.693787	0.843163
FAM98B	0.220131	0.169089	0.214066	0.998182	0.995169	1.32219
LEMD3	-0.281765	-0.222113	-0.343183	1.23098	1.63556	1.44973
SON	0.477292	0.305121	0.173886	-0.689618	-0.623658	-0.73542
POLD3	1.53653	1.66851	1.55091	-0.555895	-0.292987	-0.171076
PBK	1.25203	1.29022	1.39257	0.1655	-0.130817	-0.112959
PDCD5	1.48843	1.39248	1.35218	0.675331	0.613553	0.503362
GMPS	1.27391	1.37132	1.05923	0.228848	-0.05282	-0.0118145
HSPH1	1.70625	1.67821	1.10046	-0.867964	-0.473863	-0.406538
FN1	1.05039	0.947308	0.685498	-0.338977	-0.0596224	-0.170607
ITGA3	1.92777	1.08396	1.54167	-0.759832	-0.454978	-0.691101
MTHFD2	1.71342	1.16128	1.14822	-0.508215	-0.40965	-0.283135
EIF6	1.10473	0.555988	0.96457	-0.438877	-0.705369	-0.596841
ABI1	1.37268	1.09532	0.933532	-0.937034	-0.338271	-0.82782
NAA10	1.53074	1.40402	1.35354	0.329353	0.361566	0.440386
PYCR2	0.898403	1.44863	1.12787	-0.325107	-0.657091	-0.848043
CKS1B	1.90354	1.44395	1.51882	-0.711674	-0.271375	-0.150983
ALDH1A3	1.79393	1.66286	1.56991	-0.337684	0.332248	-0.101415
DTYMK	1.43341	0.847226	0.903609	-1.33432	-1.41407	-1.46949
